1 **Dividing subpopulation of *Escherichia coli* in stationary phase**

2

3 Arvi Jõers, Eliis Liske, Tanel Tenson\*

4

5 Institute of Technology, University of Tartu, Estonia

6

7 \*Address correspondence to Tanel Tenson, [tanel.tenson@ut.ee](mailto:tanel.tenson@ut.ee)

8

9 **Abstract**

10 The bacterial growth cycle contains different phases: after the growth substrate  
11 is exhausted of the toxic waste products accumulate the growth stops. In this  
12 non-growing culture the number of colony forming bacteria remains constant or  
13 starts to decrease. It has been shown that during prolonged incubation there is  
14 constant growth and death of bacteria and certain mutant populations take over  
15 the culture. Here we show that the dynamic cell division and death balance can  
16 be obtained even before mutants take over the culture.  
17

## 18 **Introduction**

19

20 The bacterial growth curve is classically divided into four steps: lag phase,  
21 exponential growth phase, stationary phase and death phase. Until the late  
22 1980s and early 1990s the exponential growth phase was considered as the  
23 major characteristic of a bacterium isolate and was a main target of  
24 investigations. Later research efforts have been increasingly focusing also on  
25 other phases of the growth cycle, as in nature exponential growth covers only a  
26 small period of the ecological life cycle of a bacterium [1].

27 Stationary phase occurs when bacteria have either exhausted some necessary  
28 nutrient from the medium or waste products have accumulated to the level that  
29 prohibits further growth [1,2]. The number of bacteria, usually measured by  
30 colony forming units (CFU) or optical density (OD), reaches a plateau and stay  
31 unchanged for some time. This stable situation at the bulk level can arise from  
32 two different scenarios at the individual cell level. All the cells may be indeed in  
33 nondividing state and truly static. Alternatively, constant cell death and division  
34 takes place in such a manner that the total number of (alive) cells stays the same.  
35 While the latter scenario is frequently speculated about there is surprisingly few  
36 direct studies on the matter that do not involve selection for mutants.

37 After a prolonged incubation in stationary phase mutants arise that take over the  
38 culture [3]. These are called growth advantage in stationary phase (GASP)  
39 mutants and usually have mutations in *rpoS*, *lrp* and few other genes [4]. In  
40 *Escherichia coli* these mutants are studied in LB medium, where they appear in  
41 10 days [3].

42 We have previously observed that all cells stop dividing when entering the  
43 stationary phase in LB medium and stay homogeneously nondividing during the  
44 first day(s) [5]. In this paper we analyze at the single cell level what happens  
45 between the early stationary phase and the appearance of GASP mutants.

46

47

48

## 49 **Results**

50

### 51 **Dividing subpopulation appears after a few days in stationary phase**

52

53 During the measurement of colony forming units (CFU) in stationary phase we  
54 noticed that they fluctuate (data not shown). After initial decline their level  
55 increases again after 3 - 5 days in LB. To investigate this phenomenon further we  
56 employed 2-color flow cytometric method for following cell division at the single  
57 cell level [6]. Briefly, cells contain two plasmids: one carrying inducible GFP gene  
58 and the other inducible Crimson gene. Cells are grown with Crimson expression  
59 induced and after reaching stationary phase this inducer is removed. The second  
60 inducer for GFP is added to the stationary phase culture, but because cells have  
61 ceased their activities, GFP is not expressed. However, if some cells become  
62 active again they will become GFP positive and will lose their Crimson content  
63 because of dilution by cell division.

64

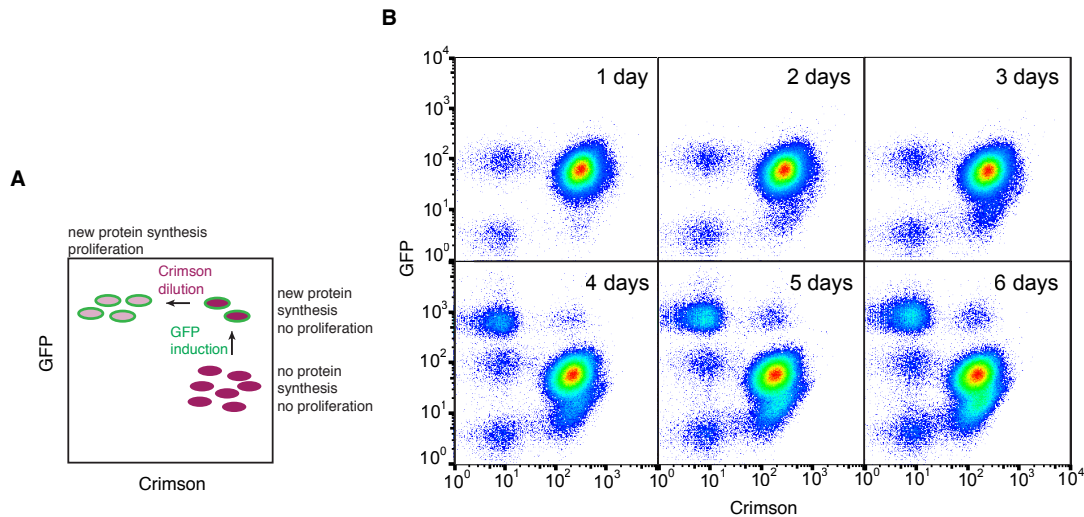

65

66

67

68

69

70

71

72

**Figure 1. Dividing cells appear in 4-day culture.** **A.** Schematic presentation of different subpopulations in stationary phase. **B.** Subpopulations in stationary phase. Cells were grown in LB with Crimson induced and after reaching stationary phase the Crimson inducer was removed and GFP inducer added (1-day culture). After 4 days GFP positive population emerges.

73

74

75

76

77

78

79

80

81

82

83

84

85

86

87

When we applied this analysis on stationary phase culture in LB the dividing subpopulation appeared in 4-day culture (Figure 1). During the first 3 days no changes can be detected and culture remains static. On the 4th day however the GFP positive cells appear indicating that some cells have started protein synthesis. Majority of GFP positive cells have also become Crimson negative, indicating that they have divided several times. Nevertheless, there is a significant GFP positive, Crimson positive subpopulation, containing cells that have become active but have not divided yet. This allows us to estimate the frequency of cells reactivating their metabolism. Based on flow cytometry data we calculate it to be 3.4 +/- 2.6 % (average +/- standard deviation). This is an underestimation, as some active cells have divided and became Crimson negative. Despite of that this value by far exceeds any reported mutation frequencies in *E. coli*, suggesting that at least the majority of active subpopulation is not caused by specific mutation.

88

### Eliminating cell division prevents increase in CFU numbers

89

90

91

92

93

94

95

96

97

98

To test if the increase of CFU in stationary phase is indeed caused by *de novo* cell division we used ampicillin to eliminate dividing cells. Ampicillin is able to lyse growing and dividing cells by disrupting their cell wall, but is harmless to nondividing cells. When ampicillin was added to stationary phase culture it did not affect the CFU count during the first 3 days, but prevented both the increase of CFU at the day 4 (Figure 2A) and the appearance of GFP positive subpopulation at the same time (Figure 2B). This indicates that *de novo* cell division is the reason behind the increase of CFU.

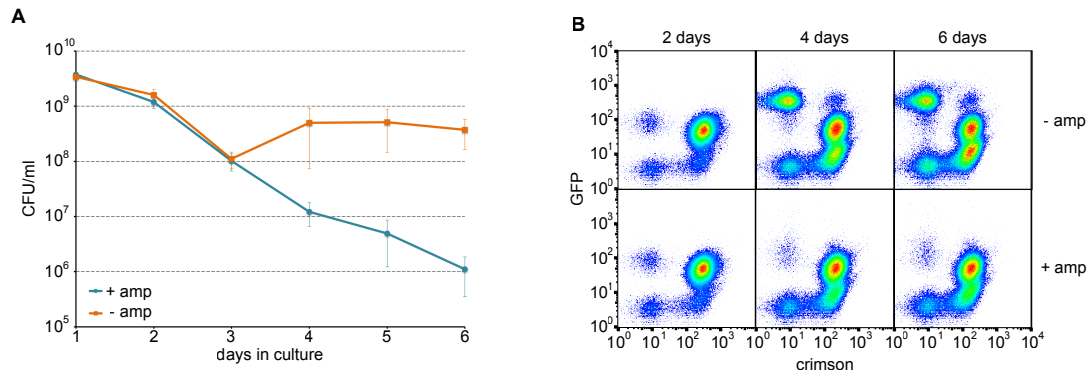

99

100

101

102 **Figure 2. Ampicillin (amp) prevents the appearance of active population.**

103 Cells were incubated in LB stationary phase culture for 6 days with or without

104 amp. Both viability test (A) and flow cytometry analysis (B) indicate the

105 inability of active subpopulation to emerge in the presence of amp.

106

107

108 **Dividing cells do not have a phenotype of a GASP mutant.**

109

110 GASP mutants, by definition, are able to outcompete wt strain during the  
111 stationary phase. Once isolated, the phenotype of these mutants is stable and  
112 they can take over the wt culture in competition experiments. We wanted to test  
113 if cells from the dividing subpopulation have acquired some mutation that allows  
114 them to outcompete wt strain. To do that we first isolated naturally occurring  
115 rifampicin (Rif) or nalidixic acid (Nal) resistant mutants and cultivated them in  
116 LB for 5 days. Both displayed phenotypic heterogeneity with dormant, active,  
117 and dividing cells present (data not shown). We then sorted dividing and  
118 dormant cells in cell sorter and plated them on agar plates to obtain single  
119 colonies (Figure 3A).

120

121

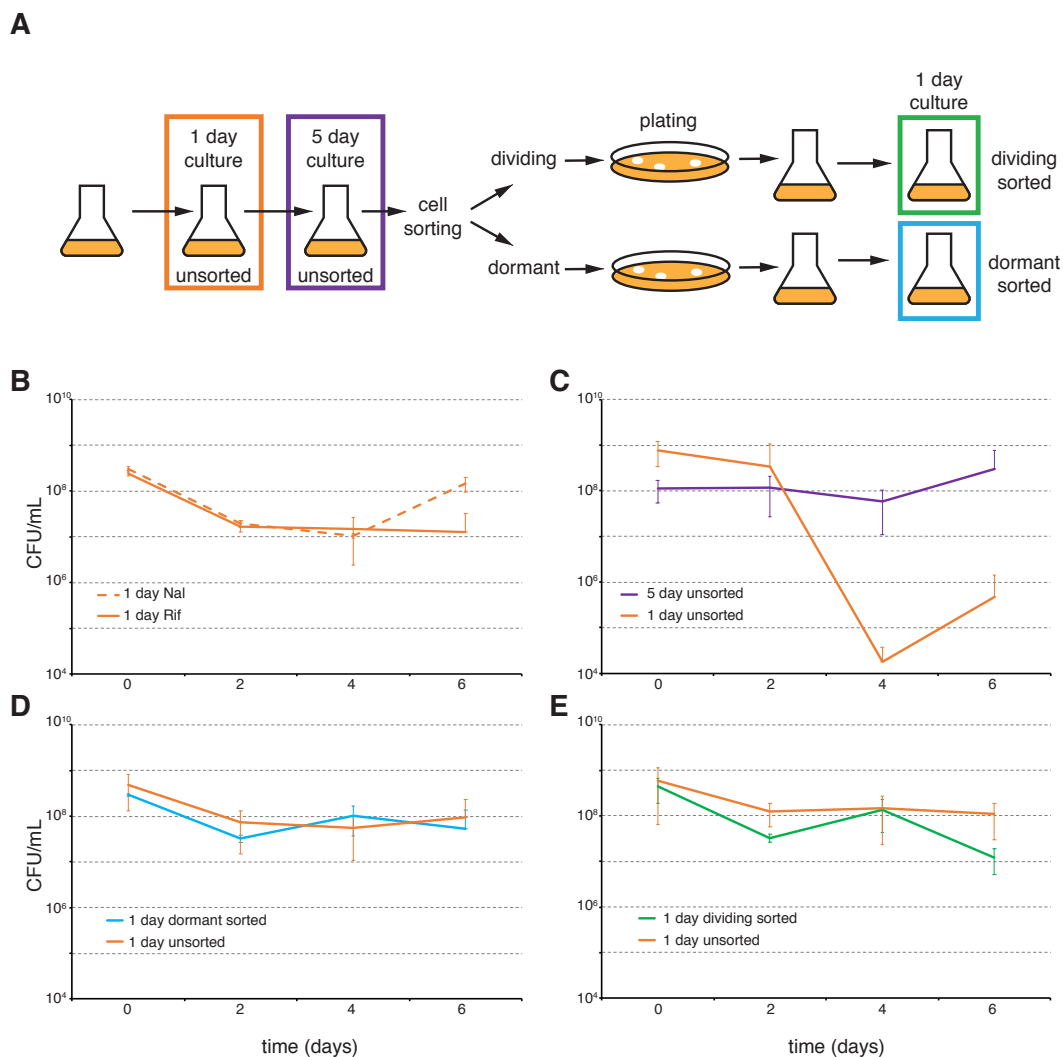

122

123

124

125

126

127

128

129

130

131

132

133

134

135

136

137

138

139

140

141

**Figure 3. Dividing cells do not have GASP phenotype.** **A.** Experimental scheme to obtain 1 day cultures with different histories. **B.** When mixed together, unsorted 1 day old cultures are neutral to each other. The averages and standard errors of 3 independent experiments are shown. **C.** 5 day unsorted culture outcompetes 1 day unsorted culture. The averages and standard errors of 6 independent experiments are shown. **D.** Sorted cells from dormant population do not outcompete 1 day unsorted culture. The averages and standard errors of 4 independent experiments (colonies) are shown. **E.** Sorted cells from dividing population do not outcompete 1 day unsorted culture. The averages and standard errors of 4 independent experiments (colonies) are shown.

Both sorted and unsorted strains were grown into stationary phase in LB and cultures with different resistance markers (Rif or Nal) were mixed together. 1 day old unsorted cultures do not gain significant growth advantage over one another in mixed culture, demonstrating marker neutrality (Figure 3B). Unsorted 5 day culture is able to outcompete unsorted 1 day culture if incubated together for more than 4 days (Figure 3C). When unsorted and sorted 1 day

142 cultures were mixed together, neither of them was able to outcompete the other  
143 (Figure 3D and 3E). It did not matter that dividing sorted cells were able to grow  
144 in previous stationary phase. After sorting and regrowth this phenotype had  
145 disappeared and they were like unsorted cells. This suggests that cell division in  
146 stationary phase is initially caused by transient phenotypic change that is not  
147 based on GASP mutation. This phenotypic change is behind the heterogeneity in  
148 the culture and also enables the 5 day culture to outcompete 1 day culture  
149 (Figure 3C).

150

## 151 Discussion

152

153 *E. coli* long term stationary phase culture in rich medium is known to be  
154 dynamic. The appearance of GASP (growth advantage in stationary phase)  
155 mutants was described more than 25 years ago and several GASP mutations have  
156 been identified [3]. It takes 10 days to develop detectable GASP mutants in LB.  
157 Here we describe that this is preceded by the appearance of dividing  
158 subpopulation of cells. These arise far too frequently to be mutants by  
159 themselves, but probably form a prerequisite for GASP mutation to occur.  
160 Cell division requires growth substrate, so there must be one present in 4 day  
161 stationary phase. Two possible sources can be envisioned. At first cells might  
162 secrete a secondary metabolite during the initial growth phase that can be used  
163 as a carbon source later. Alternatively, cells may die during the stationary phase,  
164 leak out their content and provide carbon source for surviving population. The  
165 second explanation is in accord with the fact that the CFU drops close to two  
166 orders of magnitude during the first 3 days in stationary phase indicating that  
167 most of the cells lose their viability.

168 Our results demonstrate that, depending on conditions, stationary phase in *E.*  
169 *coli* can be either static or dynamic. In the latter case phenotypic heterogeneity  
170 precedes the mutational one. Similar dynamics have been described also for  
171 antibiotic resistance mutations. There dormant subpopulation survives the  
172 periodic antibiotic treatment and gives rise to growing subpopulation during the  
173 antibiotic-free intermediate periods [7]. This facilitates the appearance of  
174 resistant mutants, providing a window of opportunity for these mutations to  
175 occur. In our case growing subpopulation in stationary phase provides more  
176 chances for GASP mutations to occur and eventually they take over the culture.  
177 Only a small number of cells start growing after 4 days in stationary phase. This  
178 might reflect the loss of viability in majority of population, although there are  
179 live cells among GFP-negative population. This could also be a manifestation of  
180 bet-hedging strategy, creating subpopulations with different phenotypes,  
181 optimal for different future environments [8]. We have shown before that  
182 heterogeneous growth resumption ensures population survival in the case of  
183 heat shock [6]. We cannot say if growth in stationary phase is a true bet-hedging  
184 behavior, but it does seem to promote a long-term survival of the microbial  
185 population.

186

187

## 188 **Methods**

189

### 190 **Bacterial strains and media**

191

192 *E. coli* strain BW25113 (F-,  $\Delta(\text{araD-araB})567$ ,  $\Delta\text{lacZ4787}(\text{:rrnB-3})$ ,  $\lambda$ -, *rph-1*,  
193  $\Delta(\text{rhaD- rhaB})568$ , *hsdR514*) was used throughout the study. Plasmids pET-GFP  
194 and pBAD-Crimson [6] were used to express GFP and E2-Crimson respectively.

195

### 196 **Detecting growth in stationary phase**

197

198 BW25113 cells containing pET-GFP and pBAD-Crimson plasmids were grown in  
199 LB supplemented with kanamycin (25 $\mu\text{g}/\text{mL}$ ) and chloramphenicol (25 $\mu\text{g}/\text{mL}$ )  
200 for plasmid retention, and arabinose (1 mM) for Crimson induction. In parallel  
201 the same strain was grown without arabinose. On the next day both cultures  
202 were centrifuged and the supernatant from arabinose-containing culture was  
203 replaced with sterile-filtered supernatant from cells grown without arabinose.  
204 This removes crimson inducer while retaining the stationary phase conditions.  
205 IPTG (1 mM) was added to induce GFP expression in cells capable of protein  
206 synthesis. Samples for flow cytometry were taken every day for 6 days.  
207 LB (Difco) was prepared freshly and sterilized by filtration through 0.22  $\mu\text{m}$   
208 filter. We noticed that the exact time of the appearance of dividing subpopulation  
209 was a little different for different LB medium batches. With the batch used in this  
210 paper active cells appear at the 4th or 5th day, whereas with some earlier  
211 batches dividing cells were visible already at the 3rd day. Regardless of the exact  
212 timing the overall phenomenon was the same every time.

213

214

### 215 **Flow cytometry**

216

217 Samples for flow cytometry were taken daily, mixed 1:1 with sterile filtered 30%  
218 glycerol in PBS and stored at -70° C pending analysis. Flow cytometry was  
219 carried out using LSRII (BD Biosciences) equipped with blue (488 nm) and red  
220 (638 nm) lasers. The detection windows for GFP and Crimson were 530 $\pm$ 15 nm  
221 and 660 $\pm$ 10 nm respectively. Flow cytometry samples stored at -70° C were  
222 thawed at room temperature and 5  $\mu\text{l}$  of cell suspension was diluted in 0.5 ml PBS  
223 to prepare for flow cytometer. At least 20 000 events were analyzed for every  
224 sample.

225 Cell sorting was done using FACSAria (BD Biosciences) with the same detection  
226 parameters using 70  $\mu\text{m}$  nozzle. GFP-negative/Crimson-positive (dormant) and  
227 GFP-positive/Crimson-negative (growing) cells were sorted into sterile PBS and  
228 plated onto LB plates to obtain individual colonies.

229

### 230 **Competition experiments**

231

232 Two competing strains (one Rif and the other Nal resistant) were mixed  
233 together, 1 ml of each, and incubated at the shaker in 37° C throughout the  
234 experiment. Every day a 10  $\mu\text{L}$  sample was taken and used to prepare serial  
235 dilutions on 96-well microtiter plate in sterile PBS. 5  $\mu\text{L}$  from every dilution was



236 spot-plated on LB plates containing either Rif (100 µg/mL) or Nal (20 µg/mL)  
237 and the colonies were counted on the next day.

238

239 **Acknowledgements**

240

241 The work was supported by European Union from the European Regional  
242 Development Fund through the Centre of Excellence in Molecular Cell  
243 Engineering (2014-2020.4.01.15-0013) and grant from the Estonian Research  
244 Council (PRG335).

245

246 **References**

247

- 248 1. Kolter R, Siegele DA, Tormo A. The Stationary Phase of The Bacterial Life  
249 Cycle. *Annu Rev Microbiol.* 1993;47: 855–874.  
250 doi:10.1146/annurev.mi.47.100193.004231
- 251 2. Navarro Llorens JM, Tormo A, Martínez-García E. Stationary phase in  
252 gram-negative bacteria. *FEMS Microbiol Rev.* 2010;34: 476–495.  
253 doi:10.1111/j.1574-6976.2010.00213.x
- 254 3. Zambrano MM, Siegele DA, Almirón M, Tormo A, Kolter R. Microbial  
255 competition: *Escherichia coli* mutants that take over stationary phase  
256 cultures. *Science (80- )*. 1993;259: 1757–1760.
- 257 4. Finkel SE. Long-term survival during stationary phase: evolution and the  
258 GASP phenotype. *Nat Rev Microbiol.* 2006;4: 113–120.  
259 doi:10.1038/nrmicro1340
- 260 5. Roostalu J, Jõers A, Luidalepp H, Kaldalu N, Tenson T. Cell division in  
261 *Escherichia coli* cultures monitored at single cell resolution. *{BMC}*  
262 *Microbiol.* 2008;8: 68. doi:10.1186/1471-2180-8-68
- 263 6. Jõers A, Tenson T. Growth resumption from stationary phase reveals  
264 memory in *Escherichia coli* cultures. *Sci Rep.* 2016;6 VN-re: 24055.  
265 doi:10.1038/srep24055
- 266 7. Levin-Reisman I, Ronin I, Gefen O, Braniss I, Shoresh N, Balaban NQ.  
267 Antibiotic tolerance facilitates the evolution of resistance. *Science.*  
268 American Association for the Advancement of Science; 2017;355: 826–  
269 830. doi:10.1126/science.aaj2191
- 270 8. Veening J-W, Smits WK, Kuipers OP. Bistability, Epigenetics, and Bet-  
271 Hedging in Bacteria. *Annu Rev Microbiol.* 2008;62: 193–210.  
272 doi:10.1146/annurev.micro.62.081307.163002

273

274

275
